# Supplementary material for: Cellstitch: 3D cellular anisotropic image segmentation via optimal transport
Source: Springer Nature journal article supplement (doi:10.1186/s12859-023-05608-2), 2023-12-15
Supplement: 12859_2023_5608_MOESM1_ESM.pdf [file 12859_2023_5608_MOESM1_ESM.pdf]

# Supplementary Materials - CellStitch: 3D Cellular Anisotropic Image Segmentation via Optimal Transport

Yining Liu<sup>1,5</sup>, YINUO Jin<sup>2,5</sup>, Elham Azizi<sup>1,2,4,5</sup>, Andrew J. Blumberg<sup>1,3,5</sup>

1. Department of Computer Science, Columbia University, New York, USA
2. Department of Biomedical Engineering, Columbia University, New York, USA
3. Department of Mathematics, Columbia University, New York, USA
4. Data Science Institute, Columbia University, New York, USA
5. Irving Institute for Cancer Dynamics, New York, USA

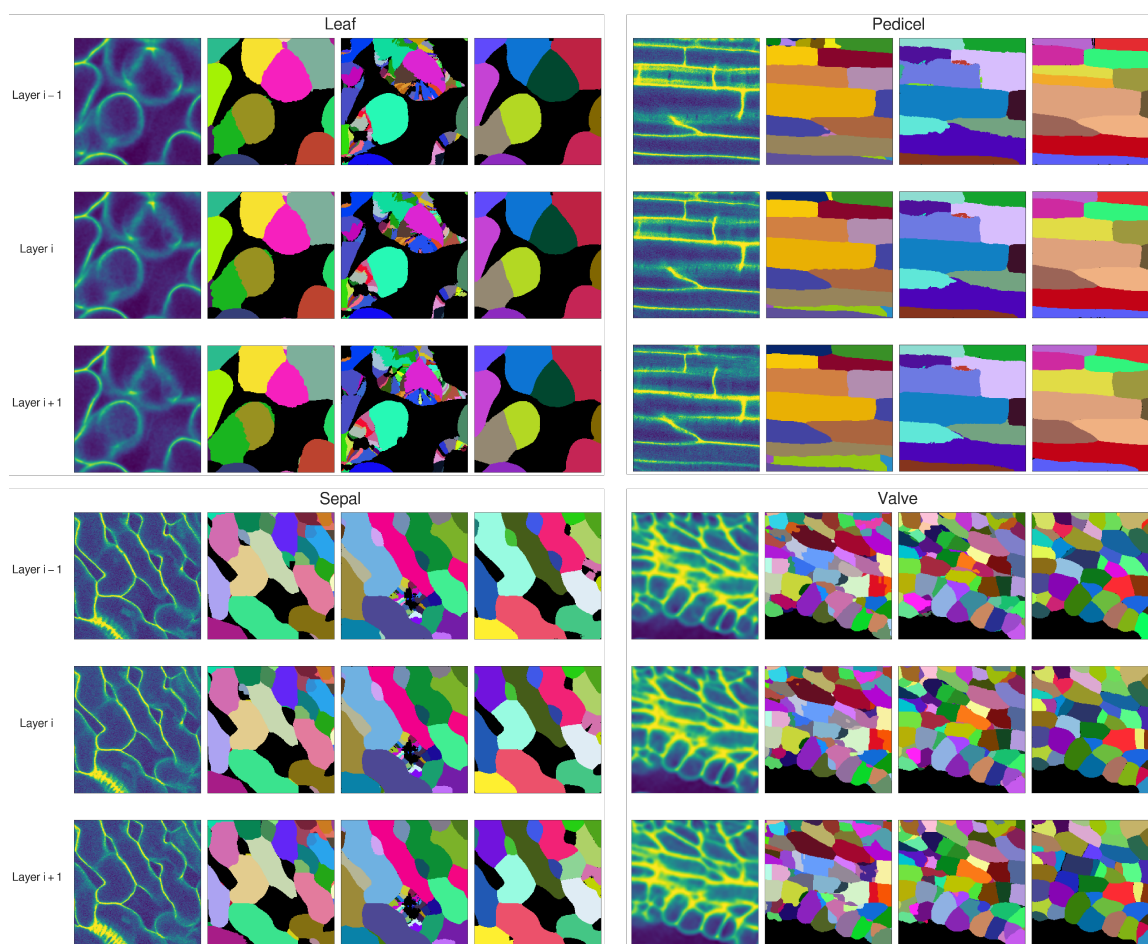

**Supplementary Figure 1:** Extended visualization of raw image, ground-truth annotations, Cellpose3D & CellStitch (left to right) on various regions of Arabidopsis 3D Digital Tissue Atlas.

| Dataset  | Method       | Precision          | Recall             | AP                 | mAP                |
|----------|--------------|--------------------|--------------------|--------------------|--------------------|
| Ovules   | CellStitch*  | <b>0.64 ± 0.08</b> | <b>0.64 ± 0.14</b> | <b>0.48 ± 0.11</b> | <b>0.51 ± 0.09</b> |
|          | 3D Watershed | 0.07 ± 0.08        | 0.20 ± 0.18        | 0.06 ± 0.06        | 0.06 ± 0.06        |
| ATAS     | CellStitch*  | <b>0.79 ± 0.08</b> | <b>0.77 ± 0.04</b> | <b>0.64 ± 0.07</b> | <b>0.70 ± 0.07</b> |
|          | 3D Watershed | 0.07 ± 0.08        | 0.07 ± 0.08        | 0.01 ± 0.01        | 0.02 ± 0.01        |
| Anther   | CellStitch*  | <b>0.66 ± 0.10</b> | <b>0.53 ± 0.11</b> | <b>0.42 ± 0.10</b> | <b>0.41 ± 0.08</b> |
|          | 3D Watershed | 0.03 ± 0.04        | 0.03 ± 0.05        | 0.01 ± 0.02        | 0.03 ± 0.03        |
| Filament | CellStitch*  | <b>0.74 ± 0.14</b> | <b>0.53 ± 0.12</b> | <b>0.46 ± 0.13</b> | <b>0.46 ± 0.11</b> |
|          | 3D Watershed | 0.04 ± 0.02        | 0.15 ± 0.09        | 0.04 ± 0.02        | 0.05 ± 0.01        |
| Leaf     | CellStitch*  | <b>0.83 ± 0.17</b> | <b>0.75 ± 0.19</b> | <b>0.68 ± 0.21</b> | <b>0.66 ± 0.18</b> |
|          | 3D Watershed | 0.00 ± 0.00        | 0.00 ± 0.00        | 0.00 ± 0.00        | 0.00 ± 0.00        |
| Pedicel  | CellStitch*  | <b>0.57 ± 0.23</b> | <b>0.44 ± 0.16</b> | <b>0.35 ± 0.16</b> | <b>0.36 ± 0.13</b> |
|          | 3D Watershed | 0.03 ± 0.03        | 0.04 ± 0.05        | 0.02 ± 0.02        | 0.02 ± 0.02        |
| Sepal    | CellStitch*  | <b>0.51 ± 0.12</b> | <b>0.43 ± 0.16</b> | <b>0.31 ± 0.12</b> | <b>0.33 ± 0.09</b> |
|          | 3D Watershed | 0.03 ± 0.05        | 0.02 ± 0.00        | 0.01 ± 0.00        | 0.02 ± 0.00        |
| Valve    | CellStitch*  | <b>0.71 ± 0.07</b> | <b>0.47 ± 0.04</b> | <b>0.40 ± 0.05</b> | <b>0.41 ± 0.11</b> |
|          | 3D Watershed | 0.00 ± 0.00        | 0.00 ± 0.00        | 0.00 ± 0.00        | 0.00 ± 0.00        |

**Supplementary Table 1:** Benchmark between CellStitch and 3D Watershed; the **best** performance (within 0.03) is in bold. The method that achieves the best performance under the majority of the metric is marked with \*.

| Dataset | Method      | Precision          | Recall             | AP                 | mAP                |
|---------|-------------|--------------------|--------------------|--------------------|--------------------|
| Ovules  | CellStitch* | <b>0.64 ± 0.08</b> | <b>0.64 ± 0.14</b> | <b>0.48 ± 0.11</b> | <b>0.51 ± 0.09</b> |
|         | Cellpose3D  | 0.08 ± 0.11        | 0.56 ± 0.22        | 0.08 ± 0.11        | 0.08 ± 0.10        |
|         | PlantSeg    | 0.38 ± 0.05        | 0.32 ± 0.07        | 0.21 ± 0.03        | 0.22 ± 0.03        |

**Supplementary Table 2:** Benchmark between competing methods on isotropic upsampled images (Z-axis) and CellStitch on anisotropic images; the **best** performance (within 0.03) is in bold. The method that achieves the best performance under the majority of the metric is marked with \*.
